# Supplementary material
Source: PubMed Central journal article supplement (PMC6434138)
Supplement: IAI.00894-18-s0001.pdf [file IAI.00894-18-s0001.pdf]

# Supplementary information

## Redundant and Distinct Roles of Secreted Protein Eap and Cell Wall-Anchored Protein SasG in Biofilm Formation and Pathogenicity of *Staphylococcus aureus*

Running Title: Roles of Eap and SasG in Biofilm and Pathogenesis

Keigo Yonemoto, Akio Chiba, Shinya Sugimoto, Chikara Sato, Mitsuru Saito, Yuki Kinjo, Keishi Marumo, and Yoshimitsu Mizunoe

### Supplementary Methods

**Purification of recombinant Eap.** Recombinant Eap from MR23 was expressed and purified using a *Brevibacillus* expression system as previously described (1). Purified Eap was subjected to SDS-PAGE and quantified by measuring the band intensity using LAS-4000 Image Analyzer (GE Healthcare). Bovine serum albumin was used as a standard. Then, purified Eap was supplemented into biofilm cultures to address whether it promotes biofilm formation.

**Atmospheric scanning electron microscopy (ASEM).** *S. aureus* MR23 wild-type and  $\Delta eap$  strains were grown in BHIG for 37°C for 4 h in ASEM dishes, as previously described (2). Biofilms formed on the dishes were fixed with 1% (v/v) glutaraldehyde/1% (v/v) paraformaldehyde and labeled with positively charged Nanogold reagent (Nanoprobes, Stony Brook, NY). After gold enhancement using GoldEnhance-EM (Nanoprobes) for 10 min at 25°C, biofilms were washed three times with doubly distilled water. Subsequently, biofilms were stained overnight with 2% (w/v) phosphate tungstic acid at 4°C. After washing three times with doubly distilled water, biofilms were immersed in radical scavenger 1% (w/v) ascorbic acid solution and imaged by ASEM (3) using the ClairScope ASEM system (JASM-6200, JEOL, Ltd, Tokyo, Japan). The acceleration voltage of the inverted SEM was 30 kV, and the applied electron dose was less than  $0.8 \text{ e}^-/\text{\AA}^2$ .

## Supplementary Figure Legends

**FIG S1** Enzymatic susceptibility of preformed *S. aureus* biofilms. For the experiments, 24-h biofilms formed by WT (A),  $\Delta eap$  (B),  $\Delta eap \Delta srtA$  (C),  $\Delta sasG$  (D), and  $\Delta eap \Delta sasG$  (E) strains were treated with the indicated enzymes or left untreated. Biomasses of the residual biofilms were quantified as described in Fig. 1. Means and standard deviations from three independent experiments are shown. \*\*,  $P < 0.01$ ; NS, not significant.

**FIG S2** Characterization of SasG in various *S. aureus* strains. Expression levels of SasG were analyzed by immunoblotting for clinical strains of methicillin-resistant (MRSA) and -sensitive *S. aureus* (MSSA) that produce protein-dependent biofilms. Molecular sizes are also indicated at the left of the panels.

**FIG S3** Biofilm formation by *S. aureus* RN4220 and its isogenic mutant strains. (A) Biofilms of the indicated RN4220-derived strains were formed and quantified as indicated in Figure 2A. (B) Biofilm formation by RN4220  $\Delta eap \Delta sasG$ -expressing Eap, SasG, and both was also analyzed. The optimal concentrations of anhydrotetracycline (aTc) were added to induce the expression of each protein. (C) SasG in the cell wall fraction and Eap in the ECM fraction from the strains grown under the indicated condition in B were detected by SDS-PAGE with CBB-staining. Red arrows indicate SasG. (D) Biofilm formation of RN4220  $\Delta eap \Delta sasG$  harboring pLC1 or pEap-SasG was analyzed in the presence of 3.13 ng/ml aTc. The indicated concentrations of purified Eap was added to biofilm cultures from the onset of biofilm formation. The means and standard deviations of biofilm biomasses from three independent experiments are shown. \*,  $P < 0.05$ ; \*\*,  $P < 0.01$ ; NS, not significant.

**FIG S4** ASEM analysis of biofilms. ASEM images of 4-h biofilms formed by MR23 WT (A) and  $\Delta eap \Delta sasG$  (B) strains labeled with positively charged Nanogold and phosphate tungstic acid are shown. Scale bars, 10  $\mu\text{m}$  ( $\times 1,000$  magnification) and 1  $\mu\text{m}$  ( $\times 10,000$  magnification).

**FIG S5** Proliferation of *S. aureus* in silkworm larvae. Silkworm larvae were sacrificed and

body fluids collected 24 h after injection of the indicated *S. aureus* strains. The body fluids were diluted and spread on mannitol salt agar plates. The plates were incubated at 37°C overnight and the obtained colonies counted. Means and standard deviations from three independent experiments are shown. NS, not significant.

**TABLE S1 Bacterial strains and plasmids used in the current study.**

| Strains and plasmids                      | Description                                                                                                                                                                          | Source or reference  |
|-------------------------------------------|--------------------------------------------------------------------------------------------------------------------------------------------------------------------------------------|----------------------|
| <i>S. aureus</i> strains                  |                                                                                                                                                                                      |                      |
| RN4220                                    | NCTC8325-4 derivative, restriction deficient mutant                                                                                                                                  | 4                    |
| RN4220 $\Delta eap$                       | The <i>eap</i> gene was deleted from RN4220                                                                                                                                          | This study           |
| RN4220 $\Delta sasG$                      | The <i>sasG</i> gene was deleted from RN4220                                                                                                                                         | This study           |
| RN4220 $\Delta eap \Delta sasG$           | The <i>eap</i> and <i>sasG</i> genes were deleted from RN4220                                                                                                                        | This study           |
| MR23                                      | A clinical isolate of MRSA from the Jikei hospital                                                                                                                                   | 1                    |
| MR23 $\Delta eap$                         | The <i>eap</i> gene was deleted from MR23                                                                                                                                            | This study           |
| MR23 $\Delta srtA$                        | The <i>srtA</i> gene was deleted from MR23                                                                                                                                           | 5                    |
| MR23 $\Delta eap \Delta srtA$             | The <i>eap</i> and <i>srtA</i> genes were deleted from MR23                                                                                                                          | This study           |
| MR23 $\Delta sasG$                        | The <i>sasG</i> gene was deleted from MR23                                                                                                                                           | This study           |
| MR23 $\Delta eap \Delta sasG$             | The <i>eap</i> and <i>sasG</i> genes were deleted from MR23                                                                                                                          | This study           |
| MR23 $\Delta eap \Delta fnbA \Delta fnbB$ | The <i>eap</i> , <i>fnbA</i> and <i>fnbB</i> genes were deleted from MR23                                                                                                            | This study           |
| MR23 $\Delta eap \Delta clfA \Delta clfB$ | The <i>eap</i> , <i>clfA</i> and <i>clfB</i> genes were deleted from MR23                                                                                                            | This study           |
| MR23 $\Delta eap \Delta spa$              | The <i>eap</i> and <i>spa</i> genes were deleted from MR23                                                                                                                           | This study           |
| MR23 $\Delta eap \Delta isdAB$            | The <i>eap</i> and <i>isdAB</i> genes were deleted from MR23                                                                                                                         | This study           |
| <i>E. coli</i> strain                     |                                                                                                                                                                                      |                      |
| DH5 $\alpha$                              | <i>fhuA2</i> $\Delta$ ( <i>argF-lacZ</i> ) <i>U169 phoA glnV44 <math>\phi</math>80</i> $\Delta$ ( <i>lacZ</i> ) <i>M15 gyrA96 recA1 relA1 endA1 thi-1 hsdR17</i>                     | Toyobo, Osaka, Japan |
| BLR (DE3)                                 | <i>F<sup>-</sup> ompT hsdS<sub>B</sub>(r<sub>B</sub><sup>-</sup> m<sub>B</sub><sup>-</sup>) gal lac ile dcm</i> $\Delta$ ( <i>srl-recA</i> ) <i>306::Tn10 (tet<sup>R</sup>)(DE3)</i> | Novagen              |
| Plasmids                                  |                                                                                                                                                                                      |                      |
| pKOR1                                     | <i>E. coli-S. aureus</i> shuttle vector plasmid for knockout of genes by allelic exchange, Amp <sup>R</sup> , Cm <sup>R</sup>                                                        | 6                    |
| pSrtA-ko                                  | pKOR1-derivative plasmid for knockout of the MR23 <i>srtA</i> gene, Amp <sup>R</sup> , Cm <sup>R</sup>                                                                               | 5                    |
| pEap-ko                                   | pKOR1-derivative plasmid for knockout of the MR23 <i>eap</i> gene, Amp <sup>R</sup> , Cm <sup>R</sup>                                                                                | This study           |
| pSasG-ko                                  | pKOR1-derivative plasmid for knockout of the MR23 <i>sasG</i> gene, Amp <sup>R</sup> , Cm <sup>R</sup>                                                                               | This study           |
| pFnbA-ko                                  | pKOR1-derivative plasmid for knockout of the MR23 <i>fnbA</i> gene, Amp <sup>R</sup> , Cm <sup>R</sup>                                                                               | This study           |
| pFnbB-ko                                  | pKOR1-derivative plasmid for knockout of the MR23 <i>fnbB</i> gene, Amp <sup>R</sup> , Cm <sup>R</sup>                                                                               | This study           |
| pClfA-ko                                  | pKOR1-derivative plasmid for knockout of the MR23 <i>clfA</i> gene, Amp <sup>R</sup> , Cm <sup>R</sup>                                                                               | This study           |
| pClfB-ko                                  | pKOR1-derivative plasmid for knock out of the MR23 <i>clfB</i> gene, Amp <sup>R</sup> , Cm <sup>R</sup>                                                                              | This study           |
| pSpa-ko                                   | pKOR1-derivative plasmid for knock out of the MR23 <i>spa</i> gene, Amp <sup>R</sup> , Cm <sup>R</sup>                                                                               | This study           |
| pIsdAB-ko                                 | pKOR1-derivative plasmid for knock out of the MR23 <i>isdAB</i> gene, Amp <sup>R</sup> , Cm <sup>R</sup>                                                                             | This study           |
| pLC1                                      | <i>E. coli-S. aureus</i> shuttle vector plasmid with <i>tetO/xyl</i> promoter, Amp <sup>R</sup> , Cm <sup>R</sup>                                                                    | 7                    |
| pEap                                      | pLC1-derivative plasmid for expression of Eap, Amp <sup>R</sup> , Cm <sup>R</sup>                                                                                                    | This study           |
| pSrtA                                     | pLC1-derivative plasmid for expression of Sortase A, Amp <sup>R</sup> , Cm <sup>R</sup>                                                                                              | This study           |
| pSasG <sup>WT</sup>                       | pLC1-derivative plasmid for expression of SasG <sup>WT</sup> , Amp <sup>R</sup> , Cm <sup>R</sup>                                                                                    | This study           |
| pSasG <sup>ΔL</sup>                       | pLC1-derivative plasmid for expression of SasG <sup>ΔL</sup> , Amp <sup>R</sup> , Cm <sup>R</sup>                                                                                    | This study           |
| pEap-SasG <sup>WT</sup>                   | pLC1-derivative plasmid for co-expression of Eap and SasG <sup>WT</sup> , Amp <sup>R</sup> , Cm <sup>R</sup>                                                                         | This study           |

---

|            |                                                                                     |            |
|------------|-------------------------------------------------------------------------------------|------------|
| pCold I    | Cold shock promoter, His <sub>6</sub> -tag gene, ColE1 <i>ori</i> , Ap <sup>R</sup> | Takara     |
| pCold-SasG | pCold I-derivative plasmid for expression of SasG(51-954)                           | This study |

---

Amp<sup>R</sup>, ampicillin-resistant; Cm<sup>R</sup>, chloramphenicol-resistant; tet<sup>R</sup>, tetracycline-resistant .

**TABLE S2 Oligonucleotide primers used in the current study.**

| Primers                | Sequences (5' to 3')                                       | Descriptions                       |
|------------------------|------------------------------------------------------------|------------------------------------|
| attB1- <i>eap</i> -F   | ggggacaagttgtacaaaaaagcaggctataaaagttcatgatgttgacc         | Disruption of <i>eap</i> in MR23   |
| <i>eap</i> -R          | gaattacacaaaaaaggagagataattttcttaattttataataaggcatctcac    | Disruption of <i>eap</i> in MR23   |
| <i>eap</i> -F          | gtgagatgccttattataaaaattaaagaaaattatctctcctttttgtgaattc    | Disruption of <i>eap</i> in MR23   |
| attB2- <i>eap</i> -R   | ggggaccactttgtacaagaaagctgggttcagtaagtcaccaactaataataat    | Disruption of <i>eap</i> in MR23   |
| attB1- <i>srtA</i> -F  | ggggacaagttgtacaaaaaagcaggcttaataatctattttcactcgttatctta   | Disruption of <i>srtA</i> in MR23  |
| <i>srtA</i> -R         | atccatccattagcgtaatagaacgtaaggctcctttataca                 | Disruption of <i>srtA</i> in MR23  |
| <i>srtA</i> -F         | tgtataaaaggagccttaacgcttattacgctaattggatgaat               | Disruption of <i>srtA</i> in MR23  |
| attB2- <i>srtA</i> -R  | ggggaccactttgtacaagaaagctgggttaaccatctattaaatataaacctacatt | Disruption of <i>srtA</i> in MR23  |
| attB1- <i>sasG</i> -F  | ggggacaagttgtacaaaaaagcaggctagattagcatatttagatgtattaaaaa   | Disruption of <i>sasG</i> in MR23  |
| <i>sasG</i> -R         | aatcaactattatataaattatgaatttttgcatactccttttcca             | Disruption of <i>sasG</i> in MR23  |
| <i>sasG</i> -F         | tggaaaaaggagatgcaaaaataatcataatttaataatagttgatt            | Disruption of <i>sasG</i> in MR23  |
| attB2- <i>sasG</i> -R  | ggggaccactttgtacaagaaagctgggtcatcattgataatttaaagatgat      | Disruption of <i>sasG</i> in MR23  |
| attB1- <i>fnbA</i> -F  | ggggacaagttgtacaaaaaagcaggctcgttcaggatcatctcattttattc      | Disruption of <i>fnbA</i> in MR23  |
| <i>fnbA</i> -R         | gaaataaacccgtcaattttgttaataataatctcctttaaattgcaaaattca     | Disruption of <i>fnbA</i> in MR23  |
| <i>fnbA</i> -F         | tgaattttgcattaaaggagatattatataaacaaaaattgacgggtttttc       | Disruption of <i>fnbA</i> in MR23  |
| attB2- <i>fnbA</i> -R  | ggggaccactttgtacaagaaagctgggtcaataaatgcaattctatattgttcgg   | Disruption of <i>fnbA</i> in MR23  |
| attB1- <i>fnbB</i> -F  | ggggacaagttgtacaaaaaagcaggctcaaagcataattaaacaaaaattgacg    | Disruption of <i>fnbB</i> in MR23  |
| <i>fnbB</i> -R         | aaataaacctgtcaattttggattgatataatattctccttaaattgcaaaattca   | Disruption of <i>fnbB</i> in MR23  |
| <i>fnbB</i> -F         | tgaattttgcattaaaggagaatattatcaatccaaaattgacagggtttttt      | Disruption of <i>fnbB</i> in MR23  |
| attB2- <i>fnbB</i> -R  | ggggaccactttgtacaagaaagctgggtgataaattgacgcgcagaactaat      | Disruption of <i>fnbB</i> in MR23  |
| attB1- <i>clfA</i> -F  | ggggacaagttgtacaaaaaagcaggctttgatattcatcatcaaaataaa        | Disruption of <i>clfA</i> in MR23  |
| <i>clfA</i> -R         | atcatatgattaatataatcattattactttattccctcttttaaaaaag         | Disruption of <i>clfA</i> in MR23  |
| <i>clfA</i> -F         | cttttaaaaaagaggggaataaagtaataatgatataaattaatcatatgat       | Disruption of <i>clfA</i> in MR23  |
| attB2- <i>clfA</i> -R  | ggggaccactttgtacaagaaagctgggttatttttctctcactaaaaaat        | Disruption of <i>clfA</i> in MR23  |
| attB1- <i>clfB</i> -F  | ggggacaagttgtacaaaaaagcaggcttgactgtcaaattttgatgcata        | Disruption of <i>clfB</i> in MR23  |
| <i>clfB</i> -R         | taatctagaaattgaaatggagtaatatttagactcggatagcgaactcag        | Disruption of <i>clfB</i> in MR23  |
| <i>clfB</i> -F         | ctgagtcgctatccgagctaaatattactccatttcaatttctagatta          | Disruption of <i>clfB</i> in MR23  |
| attB2- <i>clfB</i> -R  | ggggaccactttgtacaagaaagctgggtatgaattttatgaaatcaaacagttttt  | Disruption of <i>clfB</i> in MR23  |
| attB1- <i>isdAB</i> -F | ggggacaagttgtacaaaaaagcaggctacagttatttgaacatacaatttacc     | Disruption of <i>isdAB</i> in MR23 |
| <i>isdAB</i> -R        | aatttaataatataaataaaagacgatttagttgtttcctcctaaggata         | Disruption of <i>isdAB</i> in MR23 |
| <i>isdAB</i> -F        | tatccttaggaggaaaacaactaaatcgtcttatattaattattaaatt          | Disruption of <i>isdAB</i> in MR23 |
| attB2- <i>isdAB</i> -R | ggggaccactttgtacaagaaagctgggtgaagtaatcgaatgaggatcaaT       | Disruption of <i>isdAB</i> in MR23 |
| attB1- <i>spa</i> -F   | ggggacaagttgtacaaaaaagcaggctgaacgctcaactgaagatgaaag        | Disruption of <i>spa</i> in MR23   |
| <i>spa</i> -R          | gatatctatcgttgattgtttgttaataataacgaattatgtattgcaatac       | Disruption of <i>spa</i> in MR23   |
| <i>spa</i> -F          | gtattgcaatacataattcgttatattaacaaacaatacacacgatagatc        | Disruption of <i>spa</i> in MR23   |
| attB2- <i>spa</i> -R   | ggggaccactttgtacaagaaagctgggtcattactgtggcagctaacac         | Disruption of <i>spa</i> in MR23   |
| pLC1-F                 | ctgcagccaagctagcttggc                                      | Linearization of pLC1 vector       |
| pLC1-R                 | cccgggagatctgatatcaagcttatttta                             | Linearization of pLC1 vector       |

|                             |                                                                |                                                               |
|-----------------------------|----------------------------------------------------------------|---------------------------------------------------------------|
| pEap-F                      | atcagatctcccggggcttggtataaaacaaaaccaaaca                       | Construction of Eap-expressing plasmid                        |
| pEap-R                      | ctagcttgctgcagatcattaattgtaattttgcttgattata                    | Construction of Eap-expressing plasmid                        |
| pSrtA-F                     | atcagatctcccgggtgtataaaaggagcctaacgtatga                       | Construction of SrtA-expressing plasmid                       |
| pSrtA-R                     | ctagcttgctgcagttattgacttctgtagctacaaagatttt                    | Construction of SrtA-expressing plasmid                       |
| pSasG <sup>WT</sup> -F      | atcagatctcccgggtggaaaaaggagatgcaaag                            | Construction of SasG <sup>WT</sup> -expressing plasmid        |
| pSasG <sup>WT</sup> -R      | ctagcttgctgcagtaattctttctctacgagccaata                         | Construction of SasG <sup>WT</sup> -expressing plasmid        |
| pSasG <sup>ΔL</sup> -F      | taactgcagccaagctagcttggc                                       | Construction of SasG <sup>ΔL</sup> -expressing plasmid        |
| pSasG <sup>ΔL</sup> -R      | gcttggctgcagttattctgctcgtttttctcttgat                          | Construction of SasG <sup>ΔL</sup> -expressing plasmid        |
| pEap-SasG <sup>WT</sup> -F1 | ctgcagccaagctagcttggc                                          | Construction of Eap-SasG <sup>WT</sup> -co-expressing plasmid |
| pEap-SasG <sup>WT</sup> -R1 | atcattaattgtaattttgcttgattatagaacacaa                          | Construction of Eap-SasG <sup>WT</sup> -co-expressing plasmid |
| pEap-SasG <sup>WT</sup> -F2 | attacaattaatgattggaaaaaggagatgcaaag                            | Construction of Eap-SasG <sup>WT</sup> -co-expressing plasmid |
| pEap-SasG <sup>WT</sup> -R2 | ctagcttgctgcagtaattctttctctacgagccaata                         | Construction of Eap-SasG <sup>WT</sup> -co-expressing plasmid |
| pCold-SasG-F                | gaaggtaggcatatggctgaaaaacaatattgagaatccaactacattaaaagataatgtcc | Construction of SasG(51-954)-expressing plasmid               |
| pCold-SasG-R                | agagattacctatctttattctgctcgtttttctcttgattagctactgattctttagc    | Construction of SasG(51-954)-expressing plasmid               |
| SasG-s1                     | agtattagcatatttagatgtatttaaaaa                                 | For DNA sequencing of sasG in MR23                            |
| SasG-s2                     | tagttgaatctacccaattacaattcaag                                  | For DNA sequencing of sasG in MR23                            |
| SasG-s3                     | tatgCGGacaattcaactaatacatcagat                                 | For DNA sequencing of sasG in MR23                            |
| SasG-s4                     | ccaaaattacaacctgggaagagcgagtg                                  | For DNA sequencing of sasG in MR23                            |
| SasG-s5                     | gtaaattcactgtaagtaaagtggaaaata                                 | For DNA sequencing of sasG in MR23                            |
| SasG-s6                     | tcgaaagaagaaatcacaaaagatccgatt                                 | For DNA sequencing of sasG in MR23                            |
| SasG-s7                     | acaaaagaagagattacaaaagatccgat                                  | For DNA sequencing of sasG in MR23                            |

# Yonemoto *et al.* Figure S1

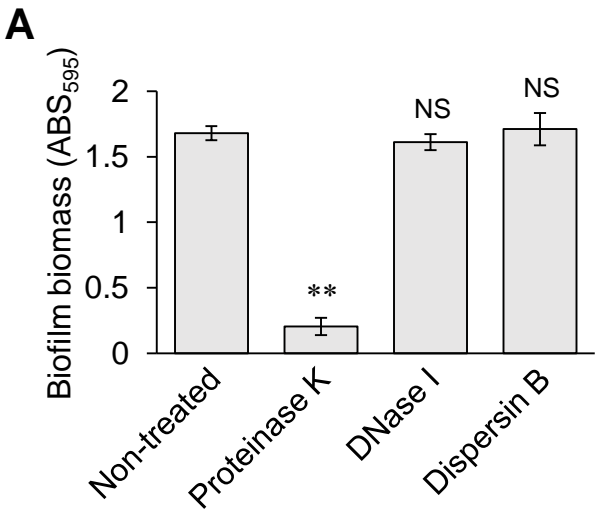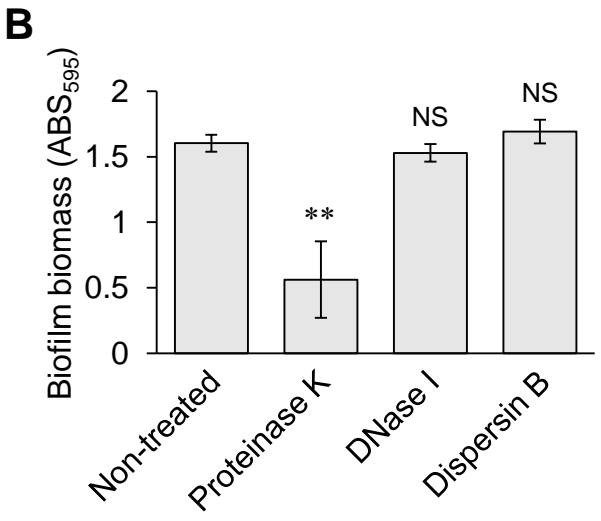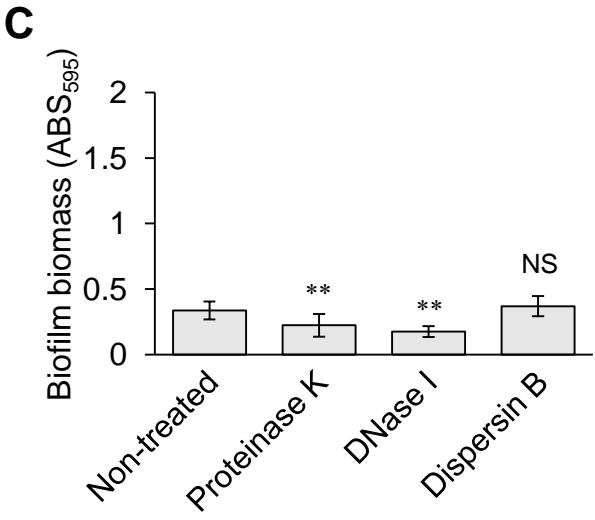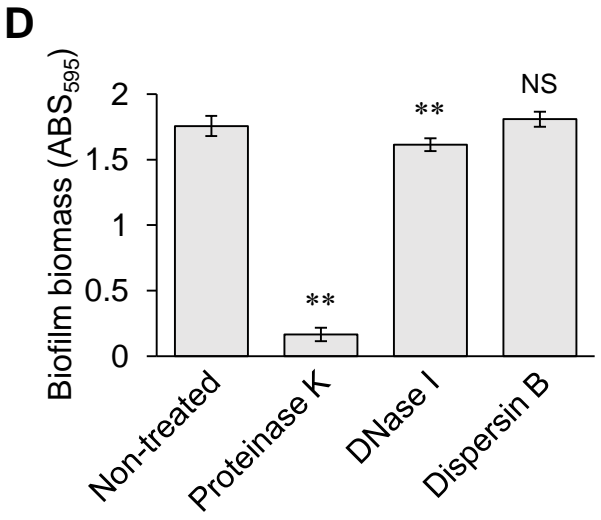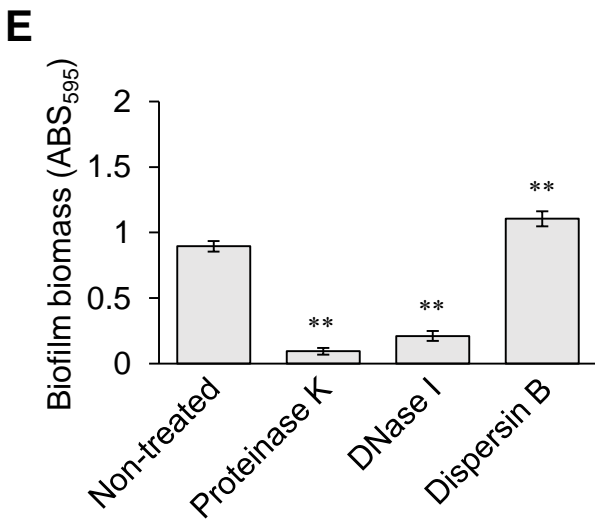



# Yonemoto *et al.* Figure S2

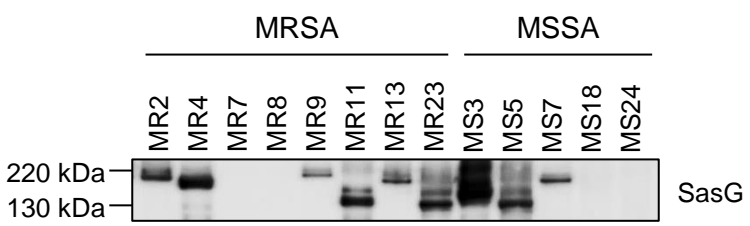

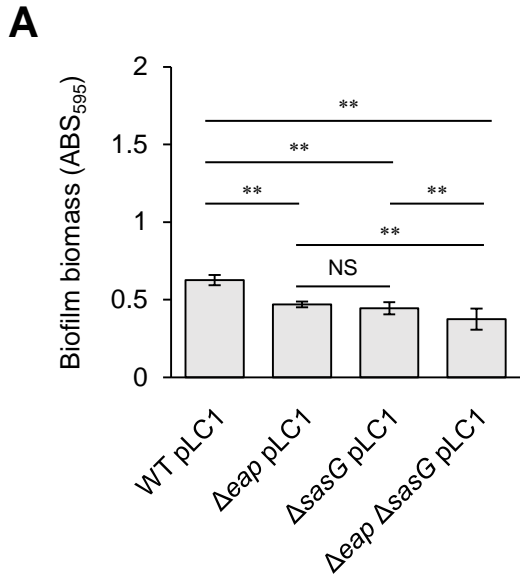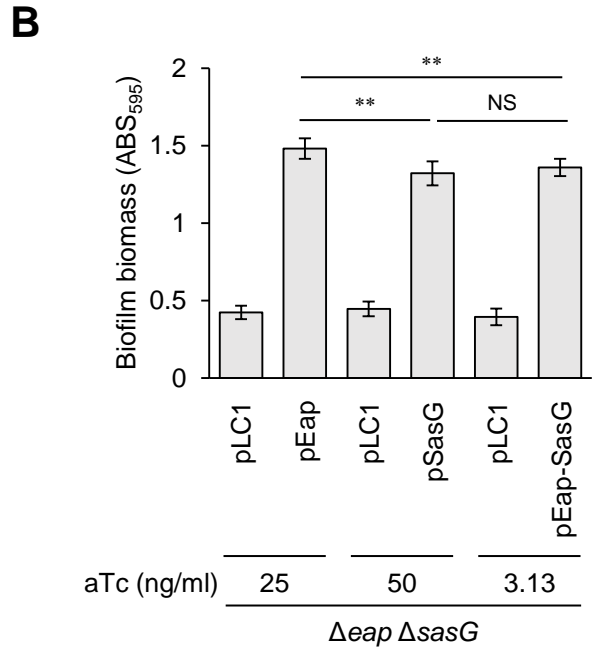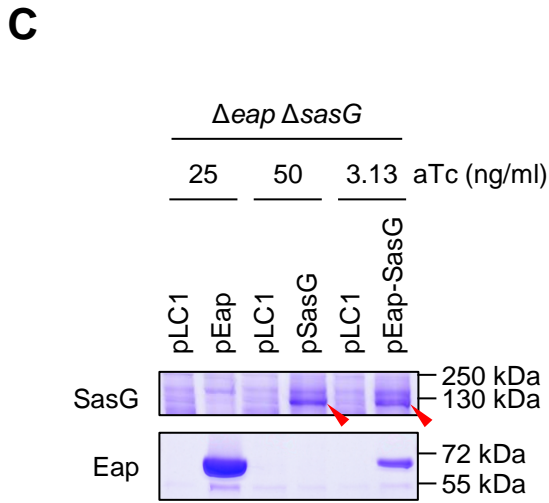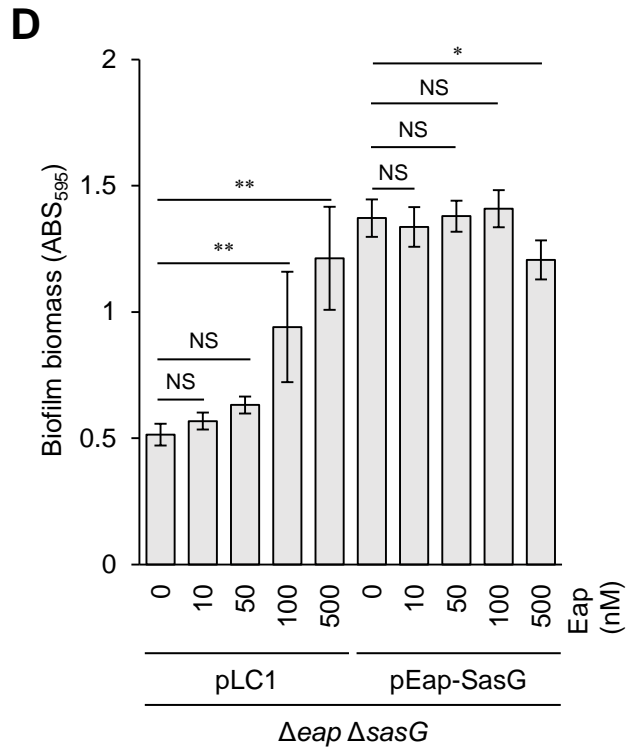

**A**

×1,000

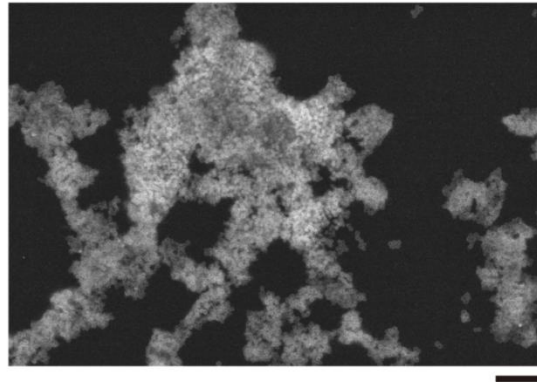

×10,000

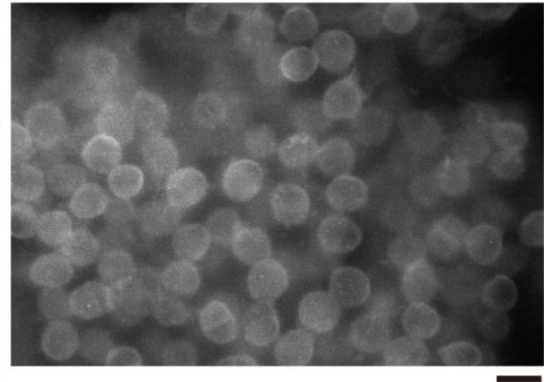

**B**

×1,000

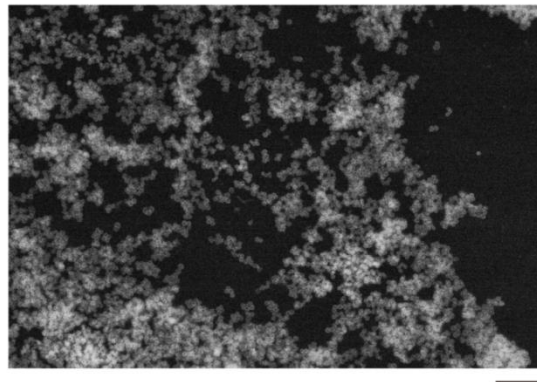

×10,000

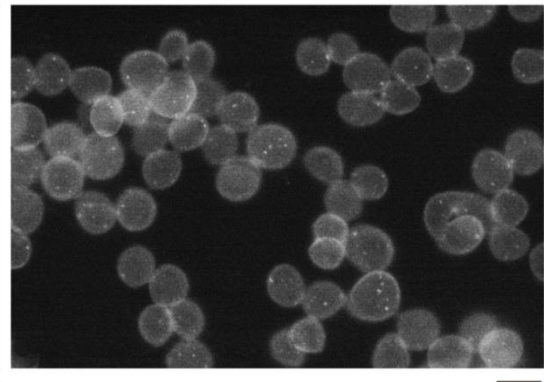

Yonemoto *et al.* Figure S5

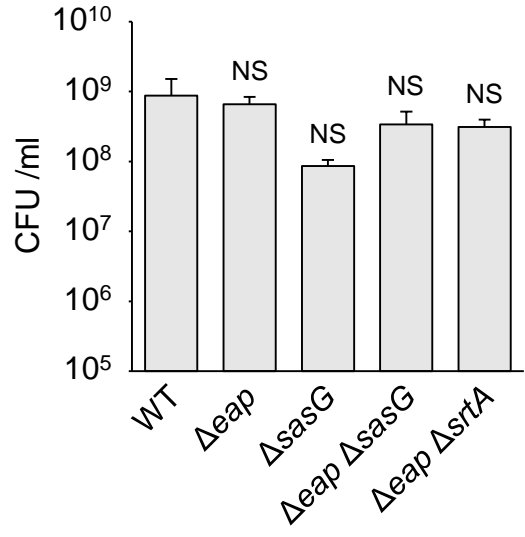

## Supplementary References

1. Sugimoto S, Iwamoto T, Takada K, Okuda K, Tajima A, Iwase T, Mizunoe Y. 2013. *Staphylococcus epidermidis* Esp Degrades Specific Proteins Associated with *Staphylococcus aureus* Biofilm Formation and Host-Pathogen Interaction. *J Bacteriol* 195:1645–1655.
2. Sugimoto S, Okuda K, Miyakawa R, Sato M, Arita-Morioka K, Chiba A, Yamanaka K, Ogura T, Mizunoe Y, Sato C. 2016. Imaging of bacterial multicellular behaviour in biofilms in liquid by atmospheric scanning electron microscopy. *Sci Rep* 6:25889.
3. Nishiyama H, Suga M, Ogura T, Maruyama Y, Koizumi M, Mio K, Kitamura S, Sato C. 2010. Atmospheric scanning electron microscope observes cells and tissues in open medium through silicon nitride film. *J Struct Biol* 172:191–202.
4. Kreiswirth BN, Löfdahl S, Betley MJ, O'Reilly M, Schlievert PM, Bergdoll MS, Novick RP. 1983. The toxic shock syndrome exotoxin structural gene is not detectably transmitted by a prophage. *Nature* 305:709–12.
5. Chiba A, Sugimoto S, Sato F, Hori S, Mizunoe Y. 2015. A refined technique for extraction of extracellular matrices from bacterial biofilms and its applicability. *Microb Biotechnol* 8:392–403.
6. Bae T, Schneewind O. 2006. Allelic replacement in *Staphylococcus aureus* with inducible counter-selection. *Plasmid* 55:58–63.
7. Cui L, Neoh H, Iwamoto A, Hiramatsu K. 2012. Coordinated phenotype switching with large-scale chromosome flip-flop inversion observed in bacteria. *Proc Natl Acad Sci* 109:E1647–E1656.
